# Supplementary material for: The UCMD-Causing COL6A1 ( c . 930 + 189 C > T ) Intron Mutation Leads to the Secretion and Aggregation of Single Mutated Collagen VI α1 Chains
Source: Hindawi journal article supplement (doi:10.1155/2023/6892763), 2023-09-06
Supplement: f1 [file 6892763.f1.pdf]

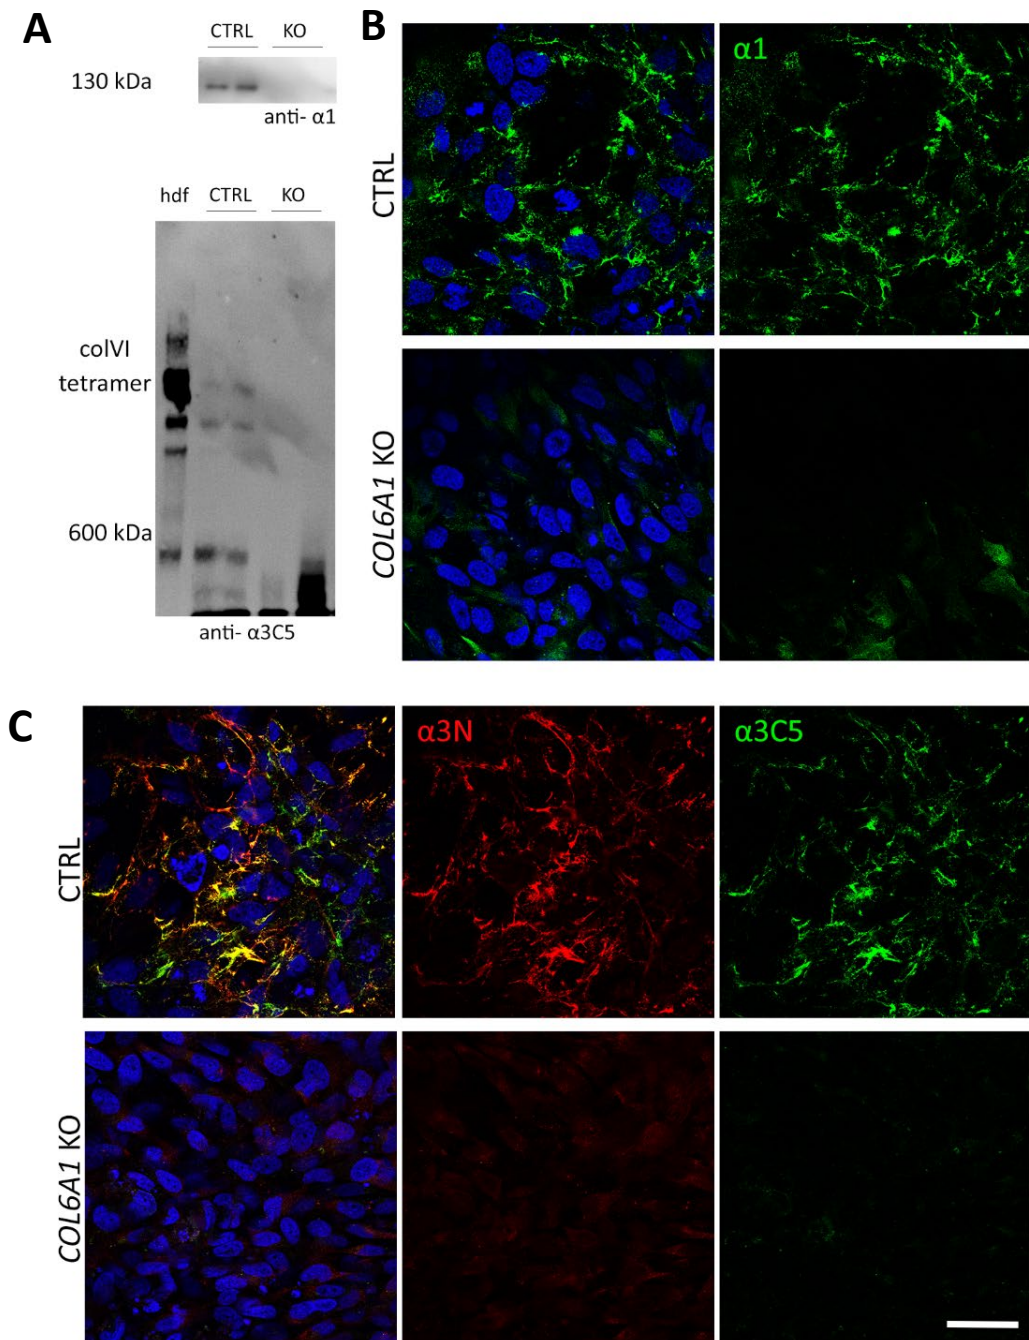

**Figure S1: Generation of  $\alpha$ 1 deficient WI-26 VA4 cell line.** (A) Supernatants from control WI-26 VA4 cells (CTRL) and COL6A1 knock out (KO) cells were separated on a 6 % SDS-PAGE gel (anti- $\alpha$ 1) and on a composite agarose/polyacrylamide gel (anti- $\alpha$ 3C5). hdf, supernatant from human dermal fibroblast cultures. (B,C) CTRL and KO cells were incubated for seven days in the presence of ascorbic acid. Labellings were performed with the  $\alpha$ 1 antibody (B) and the  $\alpha$ 3C5 and  $\alpha$ 3N antibody (C) to detect collagen VI microfibrils.

**Table S1: Synthetic double stranded DNA fragment (Invitrogen GeneArt Strings).**

| Target organism | Gene                                               | Protein   | Sequence (5' – 3')                                                                                                                                                                                                                                                                                                                                                                                                                                                                                                                                                                                                                                                                                                                                                                                                                                                                                                                                                                                                                                                                                                                                                                                                                                                                                                                                                                                                                                                    | Restriction site(s)* |
|-----------------|----------------------------------------------------|-----------|-----------------------------------------------------------------------------------------------------------------------------------------------------------------------------------------------------------------------------------------------------------------------------------------------------------------------------------------------------------------------------------------------------------------------------------------------------------------------------------------------------------------------------------------------------------------------------------------------------------------------------------------------------------------------------------------------------------------------------------------------------------------------------------------------------------------------------------------------------------------------------------------------------------------------------------------------------------------------------------------------------------------------------------------------------------------------------------------------------------------------------------------------------------------------------------------------------------------------------------------------------------------------------------------------------------------------------------------------------------------------------------------------------------------------------------------------------------------------|----------------------|
| Human           | <i>COL6A1</i><br><i>c.930+18</i><br><i>9C&gt;T</i> | Col6α1pex | tata <u>TCGAA</u> TGCCAGCCTGCAAGAGGACCTCCGGGGCTCCGGGGC<br>GACCCCGGCTTTGAGGGAGAACGAGGCAAGCCGGGGCTCCAGGA<br>GAGAAGGGAGAAGCCGGAGATCCTGGAAGACCCGGGGACCTCGG<br>ACCTGTTGGTACCAGGGAATGAAGGGAGAAAAAGGGAGCCGTG<br>GGGAGAAG <u>ACCCGCTCCACCGCCCTCGCCGTCCCTCCATCTGGA</u><br><u>AGGACAAGGACAGCCACCCAGGCACCCAGCAAAG</u> GGCTCCAGGGG<br>ACCCAAGGGCTACAAGGGAGAGAAGGGCAAGCGTGGCATCGACG<br>GGGTGGACGGCGTGAAGGGGGAGATGGGGTACCCAGGCTGCCA<br>GGCTGCAAGGGCTCGCCGGTTTACGCGCATCAAGACCCCTG<br>GCCCAAGGGAGACCCGGTGCCTTTGGACTGAAAGGAGAAAAGG<br>GCGAGCCTGGAGCTGACGGGGAGCGGGGAGACCAGGGAGCTCG<br>GGACCATCTGGAGACGAGGGCCAGCCGGGAGAGCCTGGGCCCCC<br>GGAGAGAAAGGAGAGGCGGGCGACGAGGGGAACCCAGGACCTGA<br>CGGTGCCCCGGGAGCGGGTGGCCCTGGAGAGAGAGGACCAC<br>GGGGACCCAGGCACGCGGGACCAAGAGGAGACCTGGTGAA<br>GCTGGCCCGAGGGTGATCAGGGAAGAGAAGCCCCGTTGGTGTG<br>CCTGGAGACCCGGGCGAGGCTGGCCCTATCGGACCTAAAGGCTAC<br>CGAGGCGATGAGGGTCCCCAGGGTCCGAGGGTCCAGAGGAGC<br>CCCAGGACCTGCCGACCCCTGGAGACCCGGGGCTGATGGGTGA<br>AAGGGGAGAAGACGCCCCGCTGGAAATGGCACCGAGGGCTTCCC<br>CGGCTTCCCCGGGTATCCGGGCAACAGGGGCGCTCCCGGATAAA<br>CGGCACGAAGGGTACCCCGCCTCAAGGGGGACGAGGGAGAAG<br>CCGGGACCCCGAGACGATAACAACGACATTGCACCCGAGGAG<br>TCAAAGGAGCAAAGGGTACCGGGTCCCAGGGGCCCCAGGGA<br>CCCCAGGACACCAAGGACCGCCTGGCCGGACGAATGCGAGATT<br>TTGGACATCATGAAAATGTGCTTTGCTGTGAATGCAAGTGCG<br>GCCCCATCGACCTCTGTTCGTGCTGGACAGCTCAGAGAGCATTGG<br>CCTGAGAACTTCGAGATTGCAAGGACTTCGTCGTCAAGGTCATC<br>GACCGGCTGAGCCGGGACGAGCTGGTCAAGTTCGAGCCAGGGCAG<br><u>TCGTAC</u> Gatat | BstBI<br>BsiWI       |

\*restriction sites are *underlined*, the pseudoexon encoding sequence is given in *red*.
